# Supplementary material for: Characterization of Poorly Cohesive and Signet Ring Cell Carcinomas and Identification of PTPRM as a Diagnostic Marker
Source: MDPI journal article supplement (doi:10.3390/cancers14102502), 2022-05-19
Supplement: s1 [file s1]

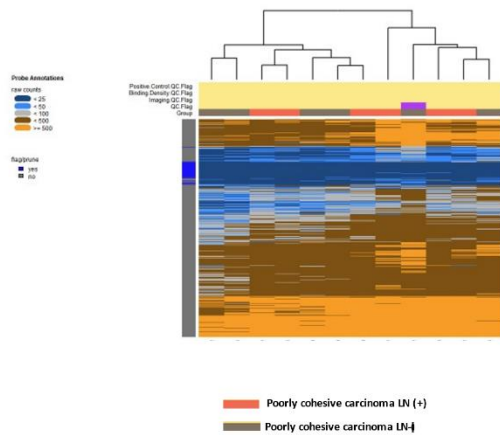

**Figure S3.** Expression comparison of genes between PC carcinoma with/without lymph node metastasis..

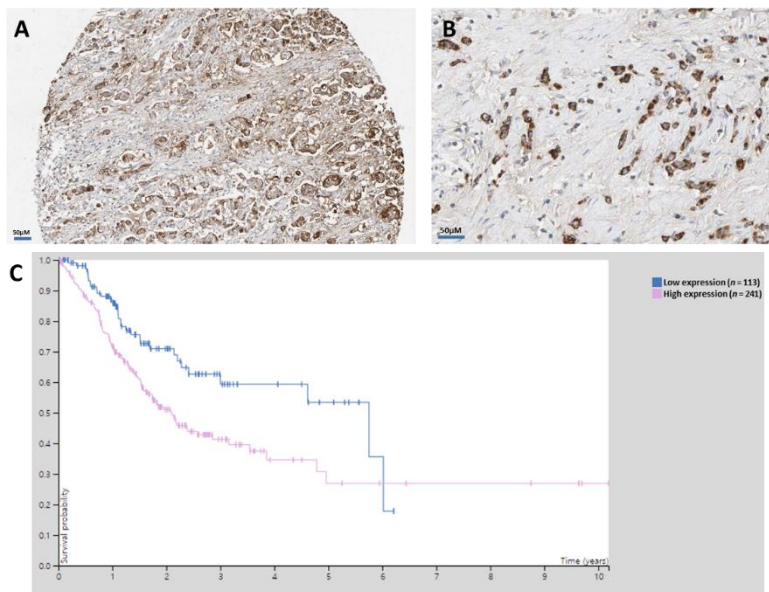

**Figure S4.** PTPRM expression in GC from the Human Protein Atlas (**A**) PTPRM was expressed in PD carcinoma (CAB022442, Patient id: 2105), (**B**) in PC carcinoma (CAB022442, Patient id: 2326), and (**C**) high PTPRM expression levels were related to poor overall survival in GC
