# Supplementary material for: Characterization of Poorly Cohesive and Signet Ring Cell Carcinomas and Identification of PTPRM as a Diagnostic Marker
Source: Cancers (Basel). 2022 May 19;14(10):2502. doi: 10.3390/cancers14102502 (PMC9139305; doi:10.3390/cancers14102502)
Supplement: Supplementary file 1 [file cancers-14-02502-s001.zip › cancers-1695937-Supplementary table.xlsx]

## Sheet: Supplementary table 1
Table S1. Lists of 770 genes of pancancer progression panel
Angiogenesis	Basal lamina	Basement membranes	Blood coagulation	Carbon cancer metabolism	Cell adhesion	Cell cycle	Cell motility	Cell proliferation	Cellular differentiatation	Cellular growth factor	Choline cancer metabolism	Collagen	ECM receptor	ECM STRUCTURE	EMT to metastasis	EMT	Fibrosis	HIF1A signaling	Hypoxia response	Integral to membrane	LOX remodeling	Metastasis response	Mestasis suppressor	MMP remodeling	Negative regulation	Plasma membrane	Positive regulation	Regulation of angiogenesis	Regulation of metabolism	Sprouting angiogenesis	Stem cell associated	TGFB signaling	Transcription factor	Vasculogenesis	VEGFA signaling
Probe Label	Probe Label	Probe Label	Probe Label	Probe Label	Probe Label	Probe Label	Probe Label	Probe Label	Probe Label	Probe Label	Probe Label	Probe Label	Probe Label	Probe Label	Probe Label	Probe Label	Probe Label	Probe Label	Probe Label	Probe Label	Probe Label	Probe Label	Probe Label	Probe Label	Probe Label	Probe Label	Probe Label	Probe Label	Probe Label	Probe Label	Probe Label	Probe Label	Probe Label	Probe Label	Probe Label
HSPG2-mRNA	HSPG2-mRNA	COL18A1-mRNA	SERPING1-mRNA	PDGFRB-mRNA	NRP1-mRNA	PDPN-mRNA	VIM-mRNA	NRP1-mRNA	MMP3-mRNA	GDF15-mRNA	PDGFRB-mRNA	MMP3-mRNA	HSPG2-mRNA	LGALS1-mRNA	NOTCH1-mRNA	SERPING1-mRNA	AGT-mRNA	ANGPT2-mRNA	MMP3-mRNA	NRP1-mRNA	CLDN1-mRNA	CTSL-mRNA	TIMP4-mRNA	MMP3-mRNA	ANGPT2-mRNA	HSPG2-mRNA	RAMP2-mRNA	SFRP1-mRNA	HK2-mRNA	NRP1-mRNA	CD34-mRNA	DCN-mRNA	CD34-mRNA	NRP1-mRNA	HSPB1-mRNA
NRP1-mRNA	LAMA5-mRNA	LAMA5-mRNA	ANGPT2-mRNA	FGFR1-mRNA	RELN-mRNA	ITGB1-mRNA	SRPX2-mRNA	COL18A1-mRNA	RELN-mRNA	NRP1-mRNA	HRAS-mRNA	COL18A1-mRNA	RELN-mRNA	HSPG2-mRNA	ZEB1-mRNA	LGALS1-mRNA	GREM1-mRNA	TIMP1-mRNA	ANGPT2-mRNA	CLDN1-mRNA	LAMA5-mRNA	RUNX1-mRNA	TIMP1-mRNA	TIMP4-mRNA	SERPINF1-mRNA	NRP1-mRNA	ANGPT2-mRNA	RNH1-mRNA	MYC-mRNA	RAMP2-mRNA	CD163-mRNA	BMPR1A-mRNA	WNT5A-mRNA	RAMP2-mRNA	PTGS2-mRNA
COL18A1-mRNA	AGRN-mRNA	TIMP1-mRNA	CD34-mRNA	FGFR2-mRNA	COL18A1-mRNA	FGFR1-mRNA	ITGB1-mRNA	CRIP2-mRNA	PDPN-mRNA	RAMP2-mRNA	AKT3-mRNA	DCN-mRNA	LAMA5-mRNA	COL18A1-mRNA	CD44-mRNA	KRT7-mRNA	HGF-mRNA	STAT3-mRNA	PLAU-mRNA	OCLN-mRNA	TIMP1-mRNA	ACTG2-mRNA	DPYSL3-mRNA	TIMP1-mRNA	AGT-mRNA	RAMP2-mRNA	CD34-mRNA	FGF2-mRNA	EIF2AK3-mRNA	EPHB4-mRNA	VIM-mRNA	ACVRL1-mRNA	WWTR1-mRNA	SFRP1-mRNA	NOS3-mRNA
RAMP2-mRNA	LAMA4-mRNA	COL7A1-mRNA	TIMP1-mRNA	HK2-mRNA	CLDN1-mRNA	ILK-mRNA	PDGFRB-mRNA	TIMP4-mRNA	WNT5A-mRNA	IGFBP4-mRNA	RAC1-mRNA	COL7A1-mRNA	COL6A3-mRNA	CRIP2-mRNA	SNAI1-mRNA	GDF15-mRNA	SNAI1-mRNA	SERPINE1-mRNA	CAV1-mRNA	ECSCR-mRNA	LOXL2-mRNA	MYLK-mRNA	CADM1-mRNA	PLAU-mRNA	NOTCH1-mRNA	CLDN1-mRNA	WNT5A-mRNA	PLXND1-mRNA	TP53-mRNA	NOTCH1-mRNA	MCAM-mRNA	SMAD5-mRNA	AEBP1-mRNA	MCAM-mRNA	HRAS-mRNA
ANGPT2-mRNA	FN1-mRNA	SERPINF1-mRNA	PLAU-mRNA	MYC-mRNA	IGFBP7-mRNA	FHL1-mRNA	FN1-mRNA	IGFBP4-mRNA	HEG1-mRNA	IGFBP7-mRNA	HIF1A-mRNA	COL6A3-mRNA	ITGA8-mRNA	DCN-mRNA	CTNNB1-mRNA	SPARCL1-mRNA	BMP7-mRNA	HK2-mRNA	SERPINA1-mRNA	EMP3-mRNA	FGF2-mRNA	MYH11-mRNA	TIMP2-mRNA	MMP1-mRNA	SULF1-mRNA	ANGPT2-mRNA	SRPX2-mRNA	CTNNB1-mRNA	ENO1-mRNA	GREM1-mRNA	EPHB4-mRNA	TGFBR2-mRNA	NOTCH1-mRNA	HEG1-mRNA	AKT3-mRNA
LAMA5-mRNA	DLG1-mRNA	TGFBI-mRNA	MMP1-mRNA	HRAS-mRNA	LAMA5-mRNA	THBS1-mRNA	STAT3-mRNA	IGFBP7-mRNA	SRPX2-mRNA	EMP3-mRNA	AKT2-mRNA	MMP1-mRNA	TNC-mRNA	IGFBP7-mRNA	TWIST2-mRNA	DCN-mRNA	CCL11-mRNA	NOS3-mRNA	THBS1-mRNA	MCAM-mRNA	SNAI1-mRNA	CNN1-mRNA	CD44-mRNA	TIMP2-mRNA	NPR1-mRNA	LAMA5-mRNA	TNFSF12-mRNA	TNFRSF12A-mRNA	PGK1-mRNA	ITGB1-mRNA	CEACAM6-mRNA	THBS1-mRNA	GREM1-mRNA	AGT-mRNA	RAC1-mRNA
ECSCR-mRNA	ANG-mRNA	TNC-mRNA	VAV3-mRNA	PKM-mRNA	CD34-mRNA	DLG1-mRNA	CALD1-mRNA	LAMA5-mRNA	MMP1-mRNA	ASPN-mRNA	PIK3R1-mRNA	HSD17B12-mRNA	AGRN-mRNA	LAMA5-mRNA	STAT3-mRNA	SACS-mRNA		TCEB2-mRNA	TNFRSF1A-mRNA	HEG1-mRNA	TGFB1-mRNA	SNRPF-mRNA	LIFR-mRNA	SERPINA1-mRNA	COL4A2-mRNA	CD34-mRNA	HSPB1-mRNA	GPR124-mRNA	PTEN-mRNA	LOXL2-mRNA	CAV1-mRNA	ACVR1-mRNA	ZEB1-mRNA	LAMA4-mRNA	AKT2-mRNA
MCAM-mRNA	ACHE-mRNA	COL4A1-mRNA	TBXA2R-mRNA	AKT3-mRNA	PDPN-mRNA	ACVR1-mRNA	TGFB1-mRNA	CD34-mRNA	AEBP1-mRNA	AGT-mRNA	PLCG1-mRNA	COL4A1-mRNA	COL4A1-mRNA	PXDN-mRNA	SNAI3-mRNA	OCLN-mRNA		ENO2-mRNA	ANGPTL4-mRNA	CAV1-mRNA	HIF1A-mRNA	NME4-mRNA	CDH11-mRNA	TMPRSS2-mRNA	MMRN2-mRNA	PDPN-mRNA	TBXA2R-mRNA	IL6-mRNA	MTOR-mRNA	BMPER-mRNA	NOTCH1-mRNA	BMP7-mRNA	RUNX1-mRNA	SRF-mRNA	PIK3R1-mRNA
TGFBI-mRNA		TIMP2-mRNA	ITGB1-mRNA	HK3-mRNA	COL7A1-mRNA	VASH1-mRNA	RAC1-mRNA	PDPN-mRNA	TNFSF12-mRNA	ITGA8-mRNA	RPS6KB2-mRNA	NID2-mRNA	COL4A2-mRNA	COL7A1-mRNA	TCF4-mRNA	WNT5A-mRNA		IGF1-mRNA	CX3CL1-mRNA	ITGA8-mRNA	ITGA3-mRNA	CST7-mRNA	GSN-mRNA	CD44-mRNA	THBS1-mRNA	OCLN-mRNA	RRAS-mRNA	HMOX1-mRNA	EIF4EBP1-mRNA	CDH13-mRNA	BMPR1A-mRNA	THBS2-mRNA	SRF-mRNA	C3-mRNA	MAPKAPK3-mRNA
SRPX2-mRNA		NID2-mRNA	SERPINA1-mRNA	HIF1A-mRNA	MCAM-mRNA	ERBB2IP-mRNA	EGFR-mRNA	TIMP1-mRNA	NOTCH1-mRNA	VAV3-mRNA	EGFR-mRNA	COL4A2-mRNA	ITGB1-mRNA	MGP-mRNA	ZEB2-mRNA	CD163-mRNA		AKT3-mRNA	NOS3-mRNA	FXYD6-mRNA	MMP2-mRNA	PTTG1-mRNA	AKAP12-mRNA	PRSS8-mRNA	BAI3-mRNA	WNT5A-mRNA	RUNX1-mRNA	ID1-mRNA	EGLN2-mRNA	SRF-mRNA	ITGB1-mRNA	BMPR2-mRNA	CD44-mRNA	ITGA5-mRNA	PLCG1-mRNA
VEZF1-mRNA		ITGB1-mRNA	TFPI2-mRNA	AKT2-mRNA	PLAU-mRNA	MYC-mRNA	SORD-mRNA	WNT5A-mRNA	HSPB1-mRNA	SULF1-mRNA	SP1-mRNA	ITGB1-mRNA	LAMA4-mRNA	SFRP1-mRNA	PROM1-mRNA	VIM-mRNA		HK3-mRNA	EPAS1-mRNA	HSD17B12-mRNA	SMAD3-mRNA	HLA-DPB1-mRNA	DLC1-mRNA	SERPINH1-mRNA	VASH1-mRNA	CD163-mRNA	C3-mRNA	WARS-mRNA	EGLN3-mRNA	FGF2-mRNA	RUNX1-mRNA	MYC-mRNA	SMAD5-mRNA	TGFBR2-mRNA	MAPK3-mRNA
TNFSF12-mRNA		LAMA4-mRNA	CXADR-mRNA	TP53-mRNA	TGFBI-mRNA	HRAS-mRNA	ITGB4-mRNA	SFRP1-mRNA	FRAS1-mRNA	BMPR1A-mRNA	MAPK3-mRNA	CSPG4-mRNA	LAMC1-mRNA	SERPINF1-mRNA	SOX2-mRNA	SFRP1-mRNA		IL6-mRNA	ANG-mRNA	FRAS1-mRNA	SMAD2-mRNA	NR4A1-mRNA	CDH1-mRNA	ADAMTS8-mRNA	THBS2-mRNA	VIM-mRNA	FGF2-mRNA	NF1-mRNA	EIF4E2-mRNA	ACVRL1-mRNA	SRF-mRNA	BMP5-mRNA	SNAI1-mRNA	QKI-mRNA	KDR-mRNA
EPHB4-mRNA		MMRN2-mRNA	ITGA5-mRNA	PIK3R1-mRNA	SRPX2-mRNA	IRF6-mRNA	PKN1-mRNA	EMP3-mRNA	NID2-mRNA	CADM1-mRNA	PIK3R5-mRNA	CD44-mRNA	CD44-mRNA	TGFBI-mRNA	MYCL-mRNA	DPYSL3-mRNA		HIF1A-mRNA	TGFB1-mRNA	BMPR1A-mRNA	MAPK1-mRNA	COL1A2-mRNA	MTBP-mRNA	SERPINE1-mRNA	STAB1-mRNA	SFRP1-mRNA	ACVRL1-mRNA	CXCL13-mRNA	SLC2A1-mRNA	THBS1-mRNA	CD44-mRNA	TGFB1-mRNA	CTNNB1-mRNA	NRP2-mRNA	PLA2G10-mRNA
CAV1-mRNA		LAMC1-mRNA	HGF-mRNA	EGFR-mRNA	COL6A3-mRNA	SOX2-mRNA	TACSTD2-mRNA	SERPINF1-mRNA	ITGB1-mRNA	GREM1-mRNA	MAPK1-mRNA	ITGA9-mRNA	ITGA5-mRNA	ASPN-mRNA	SNAI2-mRNA	EMP3-mRNA		AKT2-mRNA	MMP14-mRNA	TBXA2R-mRNA	PTK2-mRNA	EIF4E2-mRNA	NDRG1-mRNA	ADAMTS12-mRNA	MEG3-mRNA	ECSCR-mRNA	HGF-mRNA	ERBB2-mRNA	ALDOA-mRNA	CCBE1-mRNA	ITGA5-mRNA	THBS4-mRNA	ETV4-mRNA	PTGS2-mRNA	PPP3R1-mRNA
VAV3-mRNA		LOXL2-mRNA	FN1-mRNA	MAPK3-mRNA	AEBP1-mRNA	RBL2-mRNA	JAG1-mRNA	PLAU-mRNA	LAMA4-mRNA	COL4A1-mRNA	MTOR-mRNA	COL6A2-mRNA	ITGA9-mRNA	COL6A3-mRNA	TWIST1-mRNA	SERPINF1-mRNA		PIK3R1-mRNA	TGFB2-mRNA	NID2-mRNA	PDGFA-mRNA	COL1A1-mRNA	CASP8-mRNA	PRSS22-mRNA	THBS4-mRNA	MCAM-mRNA	TGFBR2-mRNA	EPHA2-mRNA	PIK3CA-mRNA	GPR124-mRNA	CDH2-mRNA	RBL2-mRNA	TWIST2-mRNA	ITGB3-mRNA	NFATC2-mRNA
COL4A2-mRNA		RUNX1-mRNA	THBS1-mRNA	PTEN-mRNA	EPHB4-mRNA	TGFB2-mRNA	ROCK1-mRNA	TGFBI-mRNA	CD44-mRNA	NPR1-mRNA	RAF1-mRNA	SERPINH1-mRNA	COL6A2-mRNA	AEBP1-mRNA	SOX9-mRNA	PTRF-mRNA		ENO1-mRNA	HIF1A-mRNA	PMP22-mRNA	MMP9-mRNA	TCF20-mRNA	NME1-mRNA	CMA1-mRNA	TIE1-mRNA	PTRF-mRNA	THBS1-mRNA			SLIT2-mRNA	THY1-mRNA	TGFB2-mRNA	BMP7-mRNA	SOX17-mRNA	PIK3R5-mRNA
SHB-mRNA		FBLN1-mRNA	ITGB3-mRNA	PIK3R5-mRNA	CAV1-mRNA	NR4A3-mRNA		TNFSF12-mRNA	ITGA5-mRNA	COL4A2-mRNA	EIF4EBP1-mRNA	EMILIN1-mRNA	ITGA1-mRNA	HSD17B12-mRNA	SMAD2-mRNA	WWTR1-mRNA		CDKN1A-mRNA	SMAD9-mRNA	ITGA5-mRNA	LLGL2-mRNA		TXNIP-mRNA	CDH1-mRNA	CXCL10-mRNA	PLAU-mRNA	PDCL3-mRNA			ANGPT1-mRNA	SNAI1-mRNA	SMAD9-mRNA	DDR2-mRNA	EGFL7-mRNA	MAPK1-mRNA
MMRN2-mRNA		CCDC80-mRNA	SERPINE1-mRNA	MET-mRNA	ITGA8-mRNA	TP53-mRNA		CAV1-mRNA	EMILIN1-mRNA	PDGFRB-mRNA	PDGFC-mRNA	ITGA1-mRNA	FN1-mRNA	TNC-mRNA	PKN1-mRNA	HEG1-mRNA		PLCG1-mRNA	ADAM17-mRNA	ITGA9-mRNA	LOX-mRNA		KDM1A-mRNA	MMP14-mRNA	KRIT1-mRNA	HEG1-mRNA	PTGS2-mRNA			FLT4-mRNA	ITGA1-mRNA	ID2-mRNA	NAA15-mRNA	GPX1-mRNA	CHP1-mRNA
APOD-mRNA		THBS2-mRNA	VEGFC-mRNA	MTOR-mRNA	ISLR-mRNA	MTBP-mRNA		VAV3-mRNA	HGF-mRNA	CDH13-mRNA	SLC44A4-mRNA	FN1-mRNA	THBS1-mRNA	FRAS1-mRNA	TCF3-mRNA	ASPN-mRNA		PGK1-mRNA	IL18-mRNA	CDH2-mRNA			HUNK-mRNA	ADAM15-mRNA	FASLG-mRNA	TGFBI-mRNA	SERPINE1-mRNA			KDR-mRNA	FGFR4-mRNA	RPS6KB2-mRNA	STAT3-mRNA	VEGFC-mRNA	PTK2-mRNA
CSPG4-mRNA		ERBB2IP-mRNA	NOS3-mRNA	FGFR3-mRNA	VAV3-mRNA	CDKN1A-mRNA		TNC-mRNA	SNAI1-mRNA	APOD-mRNA	RPS6KB1-mRNA	ABI3BP-mRNA	TNXB-mRNA	AGRN-mRNA	PRF1-mRNA	TOM1L1-mRNA		RPS6KB2-mRNA	MMP2-mRNA	KCNJ8-mRNA			CD82-mRNA	TPSB2-mRNA	CCR2-mRNA	TNFSF12-mRNA	CCBE1-mRNA			TDGF1-mRNA	FGFR2-mRNA	RBL1-mRNA	SOX17-mRNA	CX3CL1-mRNA	PLA2G2D-mRNA
SRF-mRNA		FREM2-mRNA	F3-mRNA	RAF1-mRNA	TNC-mRNA	RBL1-mRNA		SULF1-mRNA	PDCL3-mRNA	C3-mRNA	AKT1-mRNA	TNXB-mRNA	ITGB3-mRNA	COL4A1-mRNA		CEACAM6-mRNA		TCEB1-mRNA	IL1B-mRNA	PRSS8-mRNA			MAP2K4-mRNA	ADAMTS1-mRNA	HOXA5-mRNA	EPHB4-mRNA	TNFRSF1A-mRNA			ITGB1BP1-mRNA	CTNNB1-mRNA	FST-mRNA	SNAI3-mRNA	ITGB8-mRNA	RAF1-mRNA
ITGA5-mRNA		ANXA2P2-mRNA	SH2B3-mRNA	ERBB2-mRNA	CADM1-mRNA	ID4-mRNA		BMPR1A-mRNA	CTNNB1-mRNA	ITGA5-mRNA	MAP2K1-mRNA	DDR2-mRNA	ITGA7-mRNA	NID2-mRNA		CAV1-mRNA		EGFR-mRNA	NDRG1-mRNA	CDH11-mRNA			MED23-mRNA	ADAM17-mRNA	DLL4-mRNA	CEACAM6-mRNA	ANGPTL4-mRNA			BMP4-mRNA	TWIST2-mRNA	ACVR1C-mRNA	TCF4-mRNA	C3AR1-mRNA	SRC-mRNA
FGFR1-mRNA		THBS4-mRNA	IGF1-mRNA	AKT1-mRNA	NID2-mRNA	CUL1-mRNA		TIMP2-mRNA	TNXB-mRNA	FGF2-mRNA	KRAS-mRNA	COL6A1-mRNA	COL6A1-mRNA	COL4A2-mRNA		ISLR-mRNA		HMOX1-mRNA	FIGF-mRNA	S1PR1-mRNA			ARHGDIB-mRNA	MMP2-mRNA	ROCK2-mRNA	CAV1-mRNA	VEGFC-mRNA			TEK-mRNA	BMP7-mRNA	SP1-mRNA	ZEB2-mRNA	MEG3-mRNA	PLA2G2A-mRNA
THY1-mRNA		ALB-mRNA	HRAS-mRNA	MAP2K1-mRNA	ITGB1-mRNA	MAPK3-mRNA		ITGB1-mRNA	DLG1-mRNA	LIFR-mRNA	PDGFA-mRNA	CCBE1-mRNA	COL5A2-mRNA	LAMA4-mRNA		C1S-mRNA		ANGPT1-mRNA	VCAM1-mRNA	LHFP-mRNA			BRMS1-mRNA	TMPRSS4-mRNA	ITGB1BP1-mRNA	NOTCH1-mRNA	CX3CL1-mRNA			SEMA3E-mRNA	ITGB3-mRNA	ID4-mRNA	PROM1-mRNA	HIF1A-mRNA	AKT1-mRNA
PLXND1-mRNA		FBN1-mRNA	JAM2-mRNA	KRAS-mRNA	LAMA4-mRNA	CDK14-mRNA		SHB-mRNA	TMEM30B-mRNA	FGFR1-mRNA	PIK3R2-mRNA	PCOLCE-mRNA	THBS2-mRNA	LAMC1-mRNA		FXYD6-mRNA		MAPK3-mRNA	ANGPT1-mRNA	ITGA1-mRNA				ADAM9-mRNA	PDCD10-mRNA	ITGA8-mRNA	NOS3-mRNA			NR4A1-mRNA	STAT3-mRNA	CUL1-mRNA	MYC-mRNA	GJA5-mRNA	SPHK2-mRNA
ACVRL1-mRNA		ADAMTS1-mRNA	CLU-mRNA	PIK3R2-mRNA	LAMC1-mRNA	PPP2R1A-mRNA		ZEB1-mRNA	ACVR1-mRNA	ACVRL1-mRNA	JUN-mRNA	COL5A2-mRNA	LAMC2-mRNA	MFAP4-mRNA		VAV3-mRNA		NFKB1-mRNA	SMAD3-mRNA	VAMP8-mRNA				MMP17-mRNA	GTF2I-mRNA	FXYD6-mRNA	PTGIS-mRNA			VEGFA-mRNA	ITGA7-mRNA	MAPK3-mRNA	IRF6-mRNA	COL5A1-mRNA	MAP2K1-mRNA
S1PR1-mRNA		COL5A1-mRNA	RAC1-mRNA	PIK3CG-mRNA	LOXL2-mRNA	TXNIP-mRNA		LAMC1-mRNA	BMP7-mRNA	HGF-mRNA	PIK3CD-mRNA	LUM-mRNA	ITGA11-mRNA	COL6A2-mRNA		TNC-mRNA		LDHA-mRNA	CHRNA7-mRNA	FGFR2-mRNA				CASP8-mRNA	RGCC-mRNA	VAV3-mRNA	F3-mRNA			FLT1-mRNA	SOX17-mRNA	SMAD3-mRNA	EPAS1-mRNA	IL1B-mRNA	KRAS-mRNA
FN1-mRNA		VWA2-mRNA	F11R-mRNA	PIK3CD-mRNA	CDH13-mRNA	OVOL2-mRNA		PDGFRB-mRNA	PTGS2-mRNA	SMAD5-mRNA	MAP2K2-mRNA	ITGA11-mRNA	ITGB8-mRNA	ADAMTS8-mRNA		GREM1-mRNA		TLR4-mRNA	CLDN3-mRNA	BAI3-mRNA				ADAM28-mRNA	TEK-mRNA	HSPB1-mRNA	HIPK2-mRNA			CDC42-mRNA	BMPR2-mRNA	PPP2R1A-mRNA	MMP14-mRNA	CCR2-mRNA	PIK3R2-mRNA
CALCRL-mRNA		P3H2-mRNA	ALB-mRNA	MAP2K2-mRNA	APOD-mRNA	DST-mRNA		BMPER-mRNA	COL5A2-mRNA	TGFBR2-mRNA	PRKCB-mRNA	ANXA2P2-mRNA	THBS4-mRNA	EMILIN1-mRNA		ZEB1-mRNA		PIK3R5-mRNA	TLR4-mRNA	TMEM30B-mRNA				ADAM8-mRNA	HDAC5-mRNA	FRAS1-mRNA	CMA1-mRNA			PTK2B-mRNA	MYC-mRNA	ROCK2-mRNA	SOX2-mRNA	CYP1B1-mRNA	NFAT5-mRNA
FGFR2-mRNA		ITGB4-mRNA	ITGA3-mRNA	HKDC1-mRNA	CXADR-mRNA	MAPK1-mRNA		CDH13-mRNA	VEGFC-mRNA	FGFR4-mRNA	PIK3CA-mRNA	THBS4-mRNA	ITGA3-mRNA	FN1-mRNA		LOXL2-mRNA		MAPK1-mRNA	SMAD4-mRNA	NRP2-mRNA				TNF-mRNA	NF1-mRNA	SULF1-mRNA	C3AR1-mRNA				IRF6-mRNA	ID1-mRNA	RBL2-mRNA	FIGF-mRNA	VEGFA-mRNA
PDCL3-mRNA		DST-mRNA	VAV2-mRNA	SLC2A1-mRNA	SRF-mRNA	SRPK2-mRNA		PMP22-mRNA	LTBP4-mRNA	ILK-mRNA	RAC2-mRNA	HIF1A-mRNA	COL5A1-mRNA	FGFR2-mRNA		P3H1-mRNA		TEK-mRNA	NF1-mRNA	TNFRSF12A-mRNA				TPSD1-mRNA	SEMA3E-mRNA	BMPR1A-mRNA	HIPK1-mRNA				CDH1-mRNA	LEFTY1-mRNA	RORA-mRNA	VCAM1-mRNA	PIK3CG-mRNA
NRP2-mRNA		DAG1-mRNA	PLCG1-mRNA	PDK1-mRNA	CD44-mRNA	TFDP1-mRNA		APOD-mRNA	PRELP-mRNA	FHL1-mRNA		ADAM15-mRNA	COL4A6-mRNA	THBS1-mRNA		TMPRSS2-mRNA		MTOR-mRNA	EDN1-mRNA	PLXDC1-mRNA				VEGFA-mRNA	CXCR3-mRNA	TBXA2R-mRNA	HIF1A-mRNA				SOX2-mRNA	SMAD2-mRNA	HIF1A-mRNA	ANGPT1-mRNA	PLCG2-mRNA
PTGS2-mRNA		LAD1-mRNA	FIGF-mRNA	PIK3CA-mRNA	ITGA5-mRNA	SRC-mRNA		SRF-mRNA	VSIG4-mRNA	FGFR2-mRNA		IL18-mRNA	SPP1-mRNA	ABI3BP-mRNA		PMP22-mRNA		EDN1-mRNA	TNF-mRNA	ITGA7-mRNA				CXCL11-mRNA	ROCK1-mRNA	CADM1-mRNA	AQP1-mRNA				ICAM1-mRNA	BMPR1B-mRNA	ICAM1-mRNA	FLT4-mRNA	PIK3CD-mRNA
ITGB3-mRNA		LAMA3-mRNA	PECAM1-mRNA		MFAP4-mRNA	EIF4EBP1-mRNA		FGF2-mRNA	DLC1-mRNA	CXCL12-mRNA		COL5A1-mRNA	CHAD-mRNA	TNXB-mRNA		CXADR-mRNA		TF-mRNA	RAF1-mRNA	CX3CL1-mRNA				MMP9-mRNA	SPARC-mRNA	AGRN-mRNA	IL1B-mRNA				ALB-mRNA	MAPK1-mRNA	MTA1-mRNA	ID1-mRNA	MAP2K2-mRNA
TNFRSF12A-mRNA		SPARC-mRNA	ITGB2-mRNA		TNS1-mRNA	RPS27A-mRNA		LIFR-mRNA	EMCN-mRNA	ACVR1-mRNA		MMP2-mRNA	ITGB4-mRNA	BMP7-mRNA		MPDZ-mRNA		EIF4EBP1-mRNA	CD24-mRNA	PROM1-mRNA				MMP12-mRNA	PTPRM-mRNA	NPR1-mRNA	TWIST1-mRNA				SNAI2-mRNA	ZFYVE16-mRNA	HOXB3-mRNA	GATA4-mRNA	PRKCB-mRNA
PLXDC1-mRNA		FGF9-mRNA	PIK3R6-mRNA		ITGA9-mRNA	PTTG1-mRNA		FGFR1-mRNA	CMA1-mRNA	BMP7-mRNA		ECM2-mRNA	DAG1-mRNA	FBLN1-mRNA		MFAP4-mRNA		ERBB2-mRNA	CXCR4-mRNA	VSIG4-mRNA				VEGFB-mRNA	STAT1-mRNA	ITGB1-mRNA	ECM1-mRNA				ID2-mRNA	SMAD4-mRNA	NR4A3-mRNA	KDR-mRNA	CDC42-mRNA
NAA15-mRNA		SMC3-mRNA	SRGN-mRNA		COL6A2-mRNA	TCF3-mRNA		ADAMTS8-mRNA	NRXN3-mRNA	NRP2-mRNA		ADAM9-mRNA	ITGA2-mRNA	SERPINE1-mRNA		TNS1-mRNA		RPS6KB1-mRNA	EGLN2-mRNA	PTGIS-mRNA					FOXO4-mRNA	RRAS-mRNA	PLCG1-mRNA				PRKCZ-mRNA	BMP4-mRNA	SMAD9-mRNA	TDGF1-mRNA	BAD-mRNA
SERPINE1-mRNA		SMOC1-mRNA	PIK3R5-mRNA		CDH2-mRNA	RPS6KB1-mRNA		ACVRL1-mRNA	VCAN-mRNA	PTGS2-mRNA		COL4A6-mRNA	COL3A1-mRNA	COL6A1-mRNA		COL6A2-mRNA		EGLN2-mRNA	PDGFA-mRNA	F3-mRNA						SHB-mRNA	CYP1B1-mRNA				CCR2-mRNA	SMAD1-mRNA	SNAI2-mRNA	SFRP2-mRNA	PIK3CA-mRNA
SOX17-mRNA		CEP295-mRNA	MAPK1-mRNA		FERMT2-mRNA	CIB1-mRNA		S1PR1-mRNA	C3AR1-mRNA	ITGB3-mRNA		ID1-mRNA	LAMB3-mRNA	CCBE1-mRNA		EPN3-mRNA		AKT1-mRNA	EP300-mRNA	EMCN-mRNA						PDGFRB-mRNA	CHI3L1-mRNA				TWIST1-mRNA	TFDP1-mRNA	PKNOX1-mRNA	SETD2-mRNA	RAC2-mRNA
VASH1-mRNA		ITGA6-mRNA	TEK-mRNA		THY1-mRNA	MAP2K1-mRNA		HGF-mRNA	MEG3-mRNA	COL6A1-mRNA		ACHE-mRNA	LAMA3-mRNA	EGFL7-mRNA		MYLK-mRNA		MAP2K1-mRNA	VEGFA-mRNA	POPDC3-mRNA						TMPRSS2-mRNA	EPHA1-mRNA				APOE-mRNA	TNF-mRNA	ID2-mRNA	NR3C1-mRNA
JAM3-mRNA		FREM1-mRNA	KDM1A-mRNA		CDH11-mRNA	CD2AP-mRNA		TGFBR2-mRNA	ANXA2P2-mRNA	SOX17-mRNA		SRGN-mRNA	SDC4-mRNA	PCOLCE-mRNA		PPFIBP2-mRNA		PIK3R2-mRNA	FLT1-mRNA	GPR124-mRNA						CDH13-mRNA	HMOX1-mRNA				NCAM1-mRNA	RPS6KB1-mRNA	ELK3-mRNA	OVOL2-mRNA
EGFL7-mRNA			PLAUR-mRNA		S1PR1-mRNA	SMC3-mRNA		FGFR4-mRNA	TGFB1-mRNA	NDNF-mRNA		DPT-mRNA	COL1A2-mRNA	NDNF-mRNA		MRC1-mRNA		EP300-mRNA	MMP9-mRNA	NRXN3-mRNA						PMP22-mRNA	LRG1-mRNA				SOX9-mRNA	PPP2CB-mRNA	TP53-mRNA	PTK2-mRNA
ANGPTL4-mRNA			TF-mRNA		EMILIN1-mRNA	SKP1-mRNA		ILK-mRNA	TGFB2-mRNA	VEGFC-mRNA		SFRP2-mRNA	CD36-mRNA	COL5A2-mRNA		CDH2-mRNA		VEGFA-mRNA	EGLN3-mRNA	RTN4-mRNA						CSPG4-mRNA	CHRNA7-mRNA				VCAM1-mRNA	ROCK1-mRNA	MEOX2-mRNA	SPINT1-mRNA
GPX1-mRNA			RAF1-mRNA		ITGA1-mRNA	MUC1-mRNA		CALCRL-mRNA	RAC1-mRNA	BMPR2-mRNA		SMAD4-mRNA	COL1A1-mRNA	ADAMTS12-mRNA		FERMT2-mRNA		PIK3CG-mRNA	NOS2-mRNA	ERMP1-mRNA						CXADR-mRNA	CCL11-mRNA				PECAM1-mRNA	EP300-mRNA	ENO1-mRNA	PDGFC-mRNA
VEGFC-mRNA			SRC-mRNA		FN1-mRNA	FOXO4-mRNA		FGFR2-mRNA	F11R-mRNA	CX3CL1-mRNA		ITGA2-mRNA	ITGA6-mRNA	LTBP4-mRNA		KCNJ8-mRNA		FLT1-mRNA	CREBBP-mRNA	FAM174B-mRNA						CD44-mRNA	PIK3R6-mRNA				ITGB2-mRNA	SMURF1-mRNA	TWIST1-mRNA	COL3A1-mRNA
CX3CL1-mRNA			ITGAM-mRNA		ILK-mRNA	UBA52-mRNA		CXCL12-mRNA	EPHB3-mRNA	LTBP4-mRNA		COL3A1-mRNA	SV2B-mRNA	PRELP-mRNA		PRSS8-mRNA		CYBB-mRNA	VHL-mRNA	ITGA11-mRNA						MPDZ-mRNA	GATA4-mRNA				GATA4-mRNA	RBX1-mRNA	RUNX1T1-mRNA	SPHK2-mRNA
NOS3-mRNA			ITGA2-mRNA		GSN-mRNA	CAMK2D-mRNA		THBS1-mRNA	SNAI2-mRNA	LUM-mRNA		PDGFA-mRNA	ITGB7-mRNA	BGN-mRNA		CDH11-mRNA		RBX1-mRNA	HSP90B1-mRNA	FREM2-mRNA						ITGA5-mRNA	KDR-mRNA				KDR-mRNA	RHOA-mRNA	MED1-mRNA	MAP2K1-mRNA
ENPEP-mRNA			KRAS-mRNA		CXCL12-mRNA	LLGL2-mRNA		CTNNB1-mRNA	CTSG-mRNA	ERBB2IP-mRNA		COL1A2-mRNA	ITGB6-mRNA	LUM-mRNA		PLEKHO1-mRNA		PLCG2-mRNA	PTK2B-mRNA	ITGB8-mRNA						ITGA9-mRNA	SFRP2-mRNA				TDGF1-mRNA	SMURF2-mRNA	RBL1-mRNA	COL1A2-mRNA
EMCN-mRNA			PDGFA-mRNA		THBS1-mRNA	RB1-mRNA		ETV4-mRNA	ADAM15-mRNA	F3-mRNA		MMP9-mRNA		F3-mRNA		HGF-mRNA		ENO3-mRNA		C3AR1-mRNA						LIFR-mRNA	ADD1-mRNA				SFRP2-mRNA	CREBBP-mRNA	SOX9-mRNA	FGF9-mRNA
NRXN3-mRNA			SYK-mRNA		TNXB-mRNA			DLG1-mRNA	ADAMTS1-mRNA	IGF1-mRNA		COL1A1-mRNA		PKM-mRNA		SNAI1-mRNA		PIK3CD-mRNA		ROBO4-mRNA						MRC1-mRNA	ADM2-mRNA				MET-mRNA	ZFYVE9-mRNA	HOXA5-mRNA	VEGFA-mRNA
DICER1-mRNA			COL1A2-mRNA		DLG1-mRNA			TWIST2-mRNA	GJA5-mRNA	HRAS-mRNA		LOX-mRNA		CMA1-mRNA		FGL2-mRNA		MAP2K2-mRNA		CDH1-mRNA						CDH2-mRNA	TEK-mRNA				BMPR1B-mRNA		GRHL2-mRNA	HPSE-mRNA
RTN4-mRNA			FBLN5-mRNA		BMP7-mRNA			BMP7-mRNA	IL1B-mRNA	HIPK2-mRNA				VCAN-mRNA		LHFP-mRNA		PRKCB-mRNA		TIE1-mRNA						THY1-mRNA	UTS2-mRNA				ANPEP-mRNA		RBPJ-mRNA	FLT1-mRNA
ATPIF1-mRNA			PIK3R2-mRNA		NRP2-mRNA			NRP2-mRNA	TWIST1-mRNA	FBP1-mRNA				ANXA2P2-mRNA		AHNAK-mRNA		EGLN3-mRNA		CLIC4-mRNA						PLXND1-mRNA	CXCR3-mRNA				BMP4-mRNA		SP1-mRNA	AGGF1-mRNA
EPAS1-mRNA			HPSE-mRNA		ITGB3-mRNA			PTGS2-mRNA	MED1-mRNA	C3AR1-mRNA				MMP14-mRNA		DENND5A-mRNA		NOS2-mRNA		F11R-mRNA						KCNJ8-mRNA	BTG1-mRNA				TEK-mRNA		ID4-mRNA	PRKCB-mRNA
ROBO4-mRNA			PIK3CG-mRNA		TNFRSF12A-mRNA			ITGB3-mRNA	EGFR-mRNA	BMP5-mRNA				CLU-mRNA		FN1-mRNA		HKDC1-mRNA		SCNN1A-mRNA						PRSS8-mRNA	CIB1-mRNA				ITGAM-mRNA		NFKB1-mRNA	EPHA2-mRNA
ANG-mRNA			PLCG2-mRNA		DDR2-mRNA			STAT3-mRNA	SOX9-mRNA	MEG3-mRNA				THBS4-mRNA		ZCCHC24-mRNA		CREBBP-mRNA		NRXN1-mRNA						CDH11-mRNA	ISL1-mRNA				CEACAM5-mRNA		SMAD3-mRNA	COL1A1-mRNA
ANXA2P2-mRNA			CD36-mRNA		ITGA7-mRNA			VASH1-mRNA	RBPJ-mRNA	TGFB1-mRNA				TGFB2-mRNA		MYO5C-mRNA		EIF4E2-mRNA		MS4A4A-mRNA						S1PR1-mRNA	VEGFA-mRNA				CXCR3-mRNA		ID1-mRNA	VEGFB-mRNA
MMP14-mRNA			PRKCB-mRNA		COL6A1-mRNA			GPX1-mRNA	HMOX1-mRNA	IL6-mRNA				CLEC3B-mRNA		PTX3-mRNA		SLC2A1-mRNA		PNPLA6-mRNA						PLEKHO1-mRNA	FLT1-mRNA				CXCR4-mRNA		GATA4-mRNA	PIK3CA-mRNA
TIE1-mRNA			SOD1-mRNA		JAM3-mRNA			ZEB2-mRNA	P3H2-mRNA	THBS4-mRNA				FBN1-mRNA		VAMP8-mRNA		CAMK2D-mRNA		ADAM15-mRNA						ITGA1-mRNA	AGGF1-mRNA				SPARC-mRNA		RORB-mRNA	LOX-mRNA
RORA-mRNA			NOS2-mRNA		THBS2-mRNA			VEGFC-mRNA	CUL1-mRNA	TGFB2-mRNA				CTSG-mRNA		FHL1-mRNA		VHL-mRNA		SLC35A3-mRNA						TGFBR2-mRNA	PRKCB-mRNA				ISL1-mRNA		NR3C1-mRNA
TGFB2-mRNA			COL1A1-mRNA		CX3CL1-mRNA			BMPR2-mRNA	MAPK3-mRNA	CLEC3B-mRNA				CRISPLD2-mRNA		CXCL12-mRNA		PDK1-mRNA		MS4A6A-mRNA						FGFR4-mRNA	MTDH-mRNA				KRT19-mRNA		PLA2G10-mRNA
HIF1A-mRNA			ITGA6-mRNA		STAB1-mRNA			CX3CL1-mRNA	ITGB2-mRNA	SLIT2-mRNA				COL5A1-mRNA		QKI-mRNA		ALDOA-mRNA		AQP1-mRNA						ILK-mRNA	CTSH-mRNA				VEGFA-mRNA		NFATC2-mRNA
CLIC4-mRNA			ALDOA-mRNA		ERBB2IP-mRNA			NOS3-mRNA	ID1-mRNA	HIF1A-mRNA				MMP2-mRNA		TMEM30B-mRNA		PIK3CA-mRNA		ITGA3-mRNA						CALCRL-mRNA	PPP1R16B-mRNA				CEACAM1-mRNA		GTF2I-mRNA
HOXB3-mRNA			VEGFB-mRNA		LAMC2-mRNA			VSIG4-mRNA	TDGF1-mRNA	SMAD9-mRNA				HAPLN1-mRNA		RBM47-mRNA				GJA5-mRNA						VAMP8-mRNA					CD36-mRNA		SMAD2-mRNA
EIF2AK3-mRNA			PIK3CA-mRNA		DLC1-mRNA			ENPEP-mRNA	ADAM8-mRNA	ADAM17-mRNA				ECM1-mRNA		BMP7-mRNA				CCR2-mRNA						FHL1-mRNA					SLC2A1-mRNA		MAPK1-mRNA
EPHB3-mRNA			RAC2-mRNA		NRXN3-mRNA			F3-mRNA	TLR4-mRNA	ENO1-mRNA				APOE-mRNA		FBLN1-mRNA				CLDN4-mRNA						THBS1-mRNA					EPCAM-mRNA		ADD1-mRNA
PKNOX1-mRNA					VCAN-mRNA			IGF1-mRNA	PDCD10-mRNA	COL5A1-mRNA				OGN-mRNA		ANGPTL2-mRNA				TMPRSS4-mRNA						CTNNB1-mRNA					ITGA6-mRNA		SMAD4-mRNA
NRXN1-mRNA					ITGA11-mRNA			MYC-mRNA	SMAD2-mRNA	IL1B-mRNA				MMP17-mRNA		DDR2-mRNA				ADAM9-mRNA						BAI3-mRNA							SMAD1-mRNA
PNPLA6-mRNA					FREM2-mRNA			HRAS-mRNA	PROK2-mRNA	CCR2-mRNA				IL1RL1-mRNA		SERPINE1-mRNA				SLC37A1-mRNA						QKI-mRNA							MAF-mRNA
ADAM15-mRNA					ITGB8-mRNA			HIPK2-mRNA	CCL21-mRNA	VAV2-mRNA				DPT-mRNA		COL6A1-mRNA				NCAM1-mRNA						DLG1-mRNA							HDAC5-mRNA
ELK3-mRNA					CDH1-mRNA			VCAN-mRNA	ADD1-mRNA	PLCG1-mRNA				SFRP2-mRNA		JAM3-mRNA				CDS1-mRNA						ACVR1-mRNA							KDM1A-mRNA
CXCL17-mRNA					JAM2-mRNA			DICER1-mRNA	FMOD-mRNA	RPS6KB2-mRNA				EMILIN3-mRNA		CTSK-mRNA				FAP-mRNA						NRP2-mRNA							MTOR-mRNA
MAP3K7-mRNA					MMP14-mRNA			IRF6-mRNA	NF1-mRNA	ADAM9-mRNA				CFP-mRNA		TPM2-mRNA				ACVR1C-mRNA						ITGB3-mRNA							TFDP1-mRNA
KRIT1-mRNA					THBS4-mRNA			ATPIF1-mRNA	CXCR2-mRNA	OGN-mRNA				CCL21-mRNA		PCOLCE-mRNA				VCAM1-mRNA						TNFRSF12A-mRNA							PKN1-mRNA
MEOX2-mRNA					RAC1-mRNA			MEG3-mRNA	DENR-mRNA	EGFR-mRNA				FMOD-mRNA		AKAP12-mRNA				TMEM100-mRNA						DDR2-mRNA							ELF3-mRNA
GJA5-mRNA					ICAM1-mRNA			ANG-mRNA	PTK2-mRNA	FIGF-mRNA				COL3A1-mRNA		COL5A2-mRNA				DLL4-mRNA						PLXDC1-mRNA							SPDEF-mRNA
IL18-mRNA					F11R-mRNA			TGFB1-mRNA	PKN1-mRNA	ACVR1C-mRNA				SLPI-mRNA		BAG2-mRNA				GPR56-mRNA						STAT3-mRNA							PTTG1-mRNA
MMP2-mRNA					EPHB3-mRNA			MMP14-mRNA	TNF-mRNA	TYMP-mRNA				FBN2-mRNA		TCF4-mRNA				PECAM1-mRNA						ITGA7-mRNA							CHD4-mRNA
ECM1-mRNA					SNAI2-mRNA			IL6-mRNA	RPS27A-mRNA	MAPK3-mRNA				POSTN-mRNA		ZEB2-mRNA				IL1RL1-mRNA						SERPINE1-mRNA							TCF3-mRNA
VAV2-mRNA					NRXN1-mRNA			HIPK1-mRNA	ITGA2-mRNA	SMAD3-mRNA				SPARC-mRNA		ADAP1-mRNA				CHRNA7-mRNA						AKAP12-mRNA							MED23-mRNA
MED1-mRNA					ADAM15-mRNA			CLU-mRNA	CXCR3-mRNA	FLT4-mRNA				COL1A2-mRNA		TJP3-mRNA				ITGB2-mRNA						ADAP1-mRNA							NR4A1-mRNA
CYP1B1-mRNA					ADAM17-mRNA			THBS4-mRNA	COL3A1-mRNA	PPP2R1A-mRNA				FBLN5-mRNA		VIT-mRNA				MGAT5-mRNA						BMPR2-mRNA							ISL1-mRNA
EPHA1-mRNA					PIK3R1-mRNA			TGFB2-mRNA	WIPF1-mRNA	ID1-mRNA				SOD1-mRNA		BGN-mRNA				SYNE1-mRNA						CX3CL1-mRNA							NFAT5-mRNA
FAP-mRNA					ITGA3-mRNA			NR4A3-mRNA	CIB1-mRNA	GATA4-mRNA				COL1A1-mRNA		VSIG4-mRNA				TMC6-mRNA						TJP3-mRNA							FLI1-mRNA
FIGF-mRNA					IL18-mRNA			ID2-mRNA	AKT1-mRNA	CHAD-mRNA				HSP90B1-mRNA		PTGDS-mRNA				ADAM28-mRNA						STAB1-mRNA							EP300-mRNA
RBPJ-mRNA					COL5A1-mRNA			TP53-mRNA	JAG1-mRNA	KDR-mRNA				OLFML2B-mRNA		PTGIS-mRNA				RAMP1-mRNA						NOS3-mRNA							TAL1-mRNA
HMOX1-mRNA					HAPLN1-mRNA			ADAMTS1-mRNA	PDGFA-mRNA	TDGF1-mRNA						FSTL1-mRNA				SLC12A6-mRNA						PROM1-mRNA							BRMS1-mRNA
TYMP-mRNA					CYP1B1-mRNA			CXCL10-mRNA	ROCK1-mRNA	PTEN-mRNA						SH2B3-mRNA				CLDN3-mRNA						ERBB2IP-mRNA							CD36-mRNA
ANGPT1-mRNA					CLDN4-mRNA			ADAM17-mRNA	FBLN5-mRNA	TXNIP-mRNA						CEP170-mRNA				ITGB4-mRNA						ENPEP-mRNA							JUN-mRNA
TMEM100-mRNA					ADAM9-mRNA			KRIT1-mRNA	ERBB3-mRNA	SFRP2-mRNA						IGF1-mRNA				MET-mRNA						F3-mRNA							STAT1-mRNA
DLL4-mRNA					EPHA1-mRNA			FASLG-mRNA	HPSE-mRNA	NR3C1-mRNA						POPDC3-mRNA				DST-mRNA						ENO2-mRNA							PYCARD-mRNA
GPR56-mRNA					NCAM1-mRNA			IL18-mRNA	JUN-mRNA	LEFTY1-mRNA						CALD1-mRNA				DAG1-mRNA						EMCN-mRNA							FOXO4-mRNA
CASP8-mRNA					VCAM1-mRNA			IL1B-mRNA	RHOA-mRNA	MET-mRNA						VCAN-mRNA				CXCR2-mRNA						HRAS-mRNA							CREBBP-mRNA
PIK3R6-mRNA					ANGPT1-mRNA			TNFSF13-mRNA	AGGF1-mRNA	SMAD2-mRNA						IRF6-mRNA				PLAUR-mRNA						CALD1-mRNA							MTDH-mRNA
ID1-mRNA					NF2-mRNA			MTBP-mRNA	PRKCB-mRNA	BMPR1B-mRNA						FBP1-mRNA				SERINC5-mRNA						GPR124-mRNA							PRF1-mRNA
KDR-mRNA					MAPK3-mRNA			ECM1-mRNA	PTPRB-mRNA	MAPK1-mRNA						AKT3-mRNA				CD82-mRNA						NRXN3-mRNA							VHL-mRNA
RAMP1-mRNA					GPR56-mRNA			CDKN1A-mRNA	WNT5B-mRNA	SMAD4-mRNA						RTN4-mRNA				DSC2-mRNA						AKT3-mRNA							ENPP2-mRNA
WARS-mRNA					COL4A6-mRNA			APOE-mRNA	EIF4E2-mRNA	BMP4-mRNA						ERMP1-mRNA				TSPAN1-mRNA						RTN4-mRNA							RB1-mRNA
PTEN-mRNA					PECAM1-mRNA			EPHA1-mRNA	CAMK2D-mRNA	FMOD-mRNA						FAM174B-mRNA				ITGAM-mRNA						ITGA11-mRNA
SETD2-mRNA					CCL11-mRNA			OGN-mRNA	VHL-mRNA	SMAD1-mRNA						KIAA1462-mRNA				ITGA2-mRNA						FREM2-mRNA
ADAM8-mRNA					ITGB2-mRNA			EGFR-mRNA	HSP90B1-mRNA	MTOR-mRNA						DESI1-mRNA				CXCR3-mRNA						ITGB8-mRNA
SLC12A6-mRNA					MGAT5-mRNA			SOX9-mRNA	ALDOA-mRNA	EDN1-mRNA						CD46-mRNA				SLC44A4-mRNA						C3AR1-mRNA
OVOL2-mRNA					ROCK2-mRNA			FIGF-mRNA	SV2B-mRNA	FGFR3-mRNA						CDH1-mRNA				ITM2A-mRNA						CD46-mRNA
PDCD10-mRNA					SPP1-mRNA			HOXA5-mRNA	RAC2-mRNA	RAF1-mRNA						JAM2-mRNA				CXCR4-mRNA						CDH1-mRNA
ANPEP-mRNA					ACHE-mRNA			SSTR2-mRNA		SRC-mRNA						BNC2-mRNA				PLXNC1-mRNA						JAM2-mRNA
PROK2-mRNA					DPT-mRNA			HMOX1-mRNA		CXCL13-mRNA						PRR15L-mRNA				HLA-DPB1-mRNA						BNC2-mRNA
AAMP-mRNA					ADAM8-mRNA			VCAM1-mRNA		PDGFC-mRNA						EVPL-mRNA				CLDN7-mRNA						ANXA2P2-mRNA
SIRT1-mRNA					CLDN3-mRNA			NF2-mRNA		ERBB2-mRNA						CLEC2B-mRNA				SDC4-mRNA						MMP14-mRNA
SRPK2-mRNA					ITGB4-mRNA			ID4-mRNA		BTG1-mRNA						TGFB2-mRNA				CSF2RB-mRNA						IL6-mRNA
NCL-mRNA					DST-mRNA			CUL1-mRNA		CD24-mRNA						SLIT2-mRNA				CEACAM1-mRNA						CLEC2B-mRNA
ADM2-mRNA					MAPK1-mRNA			CHRNA7-mRNA		COL3A1-mRNA						HIF1A-mRNA				IL10RA-mRNA						TIE1-mRNA
TEK-mRNA					DAG1-mRNA			FLT4-mRNA		EGLN2-mRNA						CLIC4-mRNA				CD36-mRNA						SLIT2-mRNA
PTK2-mRNA					CCL21-mRNA			CCL11-mRNA		GPI-mRNA						CGN-mRNA				AREG-mRNA						RAC1-mRNA
CXCR3-mRNA					TEK-mRNA			NME1-mRNA		MAP2K1-mRNA						F11R-mRNA				MTDH-mRNA						ICAM1-mRNA
CXCL8-mRNA					PTK2-mRNA			RORB-mRNA		JAG1-mRNA						SCNN1A-mRNA				SLC2A1-mRNA						CLIC4-mRNA
GPI-mRNA					DSC2-mRNA			KDR-mRNA		KRAS-mRNA						CHRDL1-mRNA				GALNT7-mRNA						F11R-mRNA
CIB1-mRNA					FGFR3-mRNA			ACHE-mRNA		PDGFA-mRNA						BCAS1-mRNA				EPCAM-mRNA						SCNN1A-mRNA
JAG1-mRNA					SRC-mRNA			TDGF1-mRNA		SPARC-mRNA						SNAI2-mRNA				PRF1-mRNA						EPHB3-mRNA
PDGFA-mRNA					CXCL13-mRNA			PTEN-mRNA		COL1A2-mRNA						FBN1-mRNA				ITGA6-mRNA						NRXN1-mRNA
SYK-mRNA					ITGAM-mRNA			TXNIP-mRNA		FGF9-mRNA						MS4A4A-mRNA				FREM1-mRNA						CTSG-mRNA
FGF9-mRNA					ITGA2-mRNA			DPT-mRNA		PIK3R2-mRNA						CRISPLD2-mRNA				SV2B-mRNA						AKT2-mRNA
TAL1-mRNA					CXCR3-mRNA			IL15-mRNA		ERBB3-mRNA						ADAM15-mRNA				CYB561-mRNA						MAP3K7-mRNA
VEGFA-mRNA					CD24-mRNA			SFRP2-mRNA		VEGFA-mRNA						SLC35A3-mRNA				FUT3-mRNA						CXCL10-mRNA
CEACAM1-mRNA					PLXNC1-mRNA			NR3C1-mRNA		HPSE-mRNA						MEOX2-mRNA				EVI2A-mRNA						ADAM17-mRNA
PIK3CG-mRNA					LAMB3-mRNA			OVOL2-mRNA		FLT1-mRNA						MS4A6A-mRNA				ITGB7-mRNA						PRKCZ-mRNA
JUN-mRNA					IL1RN-mRNA			PDCD10-mRNA		SMURF1-mRNA						PPL-mRNA				ITGB6-mRNA						FASLG-mRNA
AGGF1-mRNA					CLDN7-mRNA			NFATC2-mRNA		CBLC-mRNA						MMP2-mRNA										AQP1-mRNA
PTPRB-mRNA					LAMA3-mRNA			MET-mRNA		MMP9-mRNA						AKAP2-mRNA										PIK3R1-mRNA
ZC3H12A-mRNA					CIB1-mRNA			APC-mRNA		MAP2K2-mRNA						TNFSF13-mRNA										ITGA3-mRNA
EPHA2-mRNA					MAP2K1-mRNA			PROK2-mRNA		PRKCB-mRNA						TWIST1-mRNA										GJA5-mRNA
VEGFB-mRNA					ARHGDIB-mRNA			BMP4-mRNA		SMURF2-mRNA						HDHD3-mRNA										PPL-mRNA
PTK2B-mRNA					ROCK1-mRNA			SRPK2-mRNA		AREG-mRNA						GIMAP6-mRNA										IL18-mRNA
PIK3CA-mRNA					SDC4-mRNA			SMAD1-mRNA		FOXO4-mRNA						RUNX1T1-mRNA										ENO1-mRNA
					POSTN-mRNA			TEK-mRNA		BAD-mRNA						CYP1B1-mRNA										MMP2-mRNA
					SYK-mRNA			NF1-mRNA		CAMK2D-mRNA						CLDN4-mRNA										CCR2-mRNA
					FBLN5-mRNA			CXCR2-mRNA		VEGFB-mRNA						ECM2-mRNA										TNFSF13-mRNA
					ERBB3-mRNA			PLAUR-mRNA		PTK2B-mRNA						TMPRSS4-mRNA										VAV2-mRNA
					CEACAM1-mRNA			DENR-mRNA		ZFYVE9-mRNA						SLC37A1-mRNA										PLCG1-mRNA
					HPSE-mRNA			MTOR-mRNA		PIK3CA-mRNA						EPHA1-mRNA										NDRG1-mRNA
					PIK3CG-mRNA			EDN1-mRNA								B3GNT3-mRNA										CLDN4-mRNA
					PTPRM-mRNA			TFDP1-mRNA								CDS1-mRNA										ADAM9-mRNA
					CD36-mRNA			FGFR3-mRNA								FAP-mRNA										APOE-mRNA
					RHOA-mRNA			RAF1-mRNA								SOX9-mRNA										EPHA1-mRNA
					AGGF1-mRNA			SRC-mRNA								GRHL2-mRNA										NCAM1-mRNA
					MAP2K2-mRNA			TACSTD2-mRNA								VCAM1-mRNA										B3GNT3-mRNA
					EPHA2-mRNA			PDGFC-mRNA								SH3YL1-mRNA										FAP-mRNA
					PTPRC-mRNA			BTG1-mRNA								AP1M2-mRNA										SSTR2-mRNA
					ITGA6-mRNA			CD24-mRNA								GPR56-mRNA										MMP17-mRNA
					CTNND1-mRNA			CIB1-mRNA								CDK14-mRNA										VCAM1-mRNA
					CCL5-mRNA			AKT1-mRNA								SYNE1-mRNA										NF2-mRNA
					FREM1-mRNA			SPHK2-mRNA								TMC6-mRNA										DLL4-mRNA
					PTK2B-mRNA			NR4A1-mRNA								SRGN-mRNA										GPR56-mRNA
					ITGB7-mRNA			JAG1-mRNA								DPT-mRNA										CDK14-mRNA
					ITGB6-mRNA			KRAS-mRNA								SFRP2-mRNA										PECAM1-mRNA
								PDGFA-mRNA								GLYR1-mRNA										IL1RL1-mRNA
								RAB25-mRNA								SORD-mRNA										CHRNA7-mRNA
								SPARC-mRNA								TJP2-mRNA										FLT4-mRNA
								SYK-mRNA								NR3C1-mRNA										ITGB2-mRNA
								FGF9-mRNA								VPS13A-mRNA										ROCK2-mRNA
								ISL1-mRNA								PPP3R1-mRNA										ADAM28-mRNA
								ERBB3-mRNA								CLDN3-mRNA										KDR-mRNA
								VEGFA-mRNA								ITGB4-mRNA										ACHE-mRNA
								PIK3CG-mRNA								OVOL2-mRNA										RAMP1-mRNA
								FLT1-mRNA								ESRP1-mRNA										TDGF1-mRNA
								PTPRM-mRNA								SAMSN1-mRNA										PTEN-mRNA
								BRMS1-mRNA								MAF-mRNA										IL15-mRNA
								JUN-mRNA								LAD1-mRNA										SFRP2-mRNA
								AGGF1-mRNA								OAS1-mRNA										TJP2-mRNA
								STAT1-mRNA								SH2D3A-mRNA										ADAM8-mRNA
								AREG-mRNA								AGR2-mRNA										SLC12A6-mRNA
								EGLN3-mRNA								SERINC5-mRNA										CLDN3-mRNA
								NOS2-mRNA								SPINT1-mRNA										TLR4-mRNA
								FOXO4-mRNA								DSC2-mRNA										ITGB4-mRNA
								MMP12-mRNA								FGFR3-mRNA										PDCD10-mRNA
								EPHA2-mRNA								CXCL13-mRNA										NFATC2-mRNA
								CTSH-mRNA								ELF3-mRNA										MET-mRNA
								PTPRC-mRNA								TACSTD2-mRNA										DST-mRNA
								EPCAM-mRNA								TSPAN1-mRNA										BMPR1B-mRNA
								VHL-mRNA								SPDEF-mRNA										ANPEP-mRNA
								VEGFB-mRNA								PDGFC-mRNA										DAG1-mRNA
								PTK2B-mRNA								CEACAM5-mRNA										AAMP-mRNA
								RAC2-mRNA								ERBB2-mRNA										ADD1-mRNA
								SET-mRNA								SLC44A4-mRNA										ESRP1-mRNA
																PLS1-mRNA										TEK-mRNA
																CD24-mRNA										CXCR2-mRNA
																ITM2A-mRNA										PLAUR-mRNA
																CXCR4-mRNA										TNFSF10-mRNA
																CKMT1A-mRNA										TF-mRNA
																PLXNC1-mRNA										CD82-mRNA
																SLPI-mRNA										PKN1-mRNA
																WIPF1-mRNA										TNF-mRNA
																IL1RN-mRNA										DSC2-mRNA
																CLDN7-mRNA										FGFR3-mRNA
																EPS8L1-mRNA										RAF1-mRNA
																LY96-mRNA										SRC-mRNA
																ARHGDIB-mRNA										RPS27A-mRNA
																RAB25-mRNA										TACSTD2-mRNA
																CD2AP-mRNA										ITGAM-mRNA
																SDC4-mRNA										ITGA2-mRNA
																SPARC-mRNA										CEACAM5-mRNA
																KRT19-mRNA										CXCR3-mRNA
																ERBB3-mRNA										ERBB2-mRNA
																FLI1-mRNA										SLC44A4-mRNA
																ARAP2-mRNA										CD24-mRNA
																CSF2RB-mRNA										CXCR4-mRNA
																CEACAM1-mRNA										PLXNC1-mRNA
																IL10RA-mRNA										GPI-mRNA
																CBLC-mRNA										IL1RN-mRNA
																MUC1-mRNA										CLDN7-mRNA
																PTK6-mRNA										CIB1-mRNA
																AREG-mRNA										LY96-mRNA
																MISP-mRNA										AKT1-mRNA
																PYCARD-mRNA										MAP2K1-mRNA
																ARHGAP32-mRNA										JAG1-mRNA
																ALOX5-mRNA										KRAS-mRNA
																CTSH-mRNA										RAB25-mRNA
																GALNT7-mRNA										CD2AP-mRNA
																PTPRC-mRNA										SDC4-mRNA
																COL1A1-mRNA										SYK-mRNA
																EPCAM-mRNA										ERBB3-mRNA
																BICC1-mRNA										CSF2RB-mRNA
																LLGL2-mRNA										CEACAM1-mRNA
																MYO1D-mRNA										PIK3CG-mRNA
																ST14-mRNA										FLT1-mRNA
																ENPP2-mRNA										SMURF1-mRNA
																CYB561-mRNA										IL10RA-mRNA
																OLFML2B-mRNA										CYBB-mRNA
																GIMAP4-mRNA										PTPRM-mRNA
																FUT3-mRNA										PLCG2-mRNA
																GZMK-mRNA										CD36-mRNA
																EVI2A-mRNA										RHOA-mRNA
																LOX-mRNA										PIK3CD-mRNA
																S100A14-mRNA										PRKCB-mRNA
																ITGB6-mRNA										MUC1-mRNA
																										SOD1-mRNA
																										PTK6-mRNA
																										PTPRB-mRNA
																										SMURF2-mRNA
																										WNT5B-mRNA
																										ZC3H12A-mRNA
																										CDC42-mRNA
																										EPHA2-mRNA
																										MTDH-mRNA
																										ARHGAP32-mRNA
																										SLC2A1-mRNA
																										PTPRC-mRNA
																										EPCAM-mRNA
																										PRF1-mRNA
																										UBA52-mRNA
																										ITGA6-mRNA
																										CAMK2D-mRNA
																										CTNND1-mRNA
																										HSP90B1-mRNA
																										PPP1R16B-mRNA
																										ST14-mRNA
																										ENPP2-mRNA
																										CYB561-mRNA
																										RAC2-mRNA
																										S100A14-mRNA
																										ITGB7-mRNA
																										ITGB6-mRNA

## Sheet: Supplementary table 2
Table S2. TaqMan real-time PCR assay probes
	TaqMan real-time PCR assay
Gene name	Assay identification
ANPEP	Hs00174265_m1
PROK2	Hs015887689_m1
PTPRM	Hs01124552_m1
CHP2	Hs00223086_m1
AREG	Hs00950669_m1
COL7A1	Hs00164310_m1
GAPDH	Control
ANPEP, Alanyl Aminopeptidase; PROK2, Prokineticin 2; PTPRM, Protein Tyrosine Phosphatase Receptor Type M; CHP2, Calcineurin Like EF-Hand Protein 2; AREG, Amphiregulin; COL6A1, Collagen Type VI Alpha 1 Chain

## Sheet: Supplementary table 3
Table S3. Antibodies for IHC
Antibodies
aminopeptidase (ANPEP)	LS–B14282, 1:50, LSBio, Seattle, USA
prokinetin (PROK2)	NBP2-43853, 1:100, Novus Biologicals, Littleton,CO, USA
calcineurin B homologous protein isoform 2 (CHP2)	NBP2-15664, 1:100, Novus Biologicals, Littleton, CO, USA
protein tyrosine phosphatase receptor type M (PTPRM)	ab231607, 1:100, abcam, Cambridge, England
amphiregulin (AREG)	SC-74501, 1:100, Santacruz, Texas Dallas, USA
COL7A1	HPA042420, Atlas. Naka, Sweden

## Sheet: Supplementary table 4
Table S4. Pearson correlations of IHC results.
		ANPEP	PROK2	PTPRM	AREG	CHP2
PC carcinoma	Pearson correlation	-0.116	-0.334	-0.334	-0.077	-0.363
	P-value	0.422	0.018	0.018	0.594	0.01
